# Supplementary material
Source: HighWire-hosted journal article supplement (https://www.ijssurgery.com/content/8473)
Supplement: inline-supplementary-material-3 [file inline-supplementary-material-3.docx]

| Su**rgical Characteristics** | **Number (%)** |
| --- | --- |
|  |  |
| Type of surgery |  |
| *Corpectomy with stabilization* | 70 (48.6) |
| *Decompression and stabilization* | 63 (43.8) |
| *Decompression alone* | 5 (3.5) |
| *Stabilization alone* | 6 (4.2) |
|  |  |
| Approach |  |
| *Posterior* | 116 (80.6) |
| *Anterior* | 17 (11.8) |
| *Combined* | 11 (7.6) |
|  |  |
| Timing |  |
| *Acute (< 24 hours)* | 44 (30.6) |
| *Semi elective (<1 week)* | 81 (56.3) |
| *Elective (> 1 week)* | 19 (13.2) |
|  |  |
| Length of procedure | **Median time in min (± SD)** |
| *Corpectomy with stabilization* | 267 (±88) |
| *Decompression and stabilization* | 210 (±60) |
| *Decompression* | n/a |
| *Stabilization* | n/a |

Supplementary Table 3: Surgical characteristics. Abbreviations: SD, standard deviation
